# Supplementary material for: Stem cell factor is implicated in microenvironmental interactions and cellular dynamics of chronic lymphocytic leukemia
Source: PubMed Central journal article supplement — Haematologica. 2020 Mar 26;106(3):692–700. doi: 10.3324/haematol.2019.236513 (PMC7927890; doi:10.3324/haematol.2019.236513), 2020-03-26
Supplement: 2019_236513-Disclosures_Contributions.pdf [file 2019_236513-Disclosures_Contributions.pdf]

Haematologica  
HAEMATOL/2019/236513  
Version 3

Stem cell factor Is implicated In microenvironmental interactions and cellular dynamics of chronic lymphocytic leukemia

George I. Gavriilidis, Stavroula Ntoufa, Nikos Papakonstantinou, Konstantia Kotta, Triantafyllia Koletsa, Elisavet Chartomatsidou, Theodoros Moysiadis, Niki Stavroyianni, Achilles Anagnostopoulos, Eleni Papadaki, Asterios S. Tsiftoglou, and Kostas Stamatopoulos

Disclosures: KS has received research support and honoraria from Janssen Pharmaceutica, Gilead Sciences and Abbvie SA.

Contributions: G.I.G. and S.N. designed the research, performed the study and wrote the manuscript; N.P. designed the research and assisted in data analysis, and interpretation; K.K., E.C. assisted in research, data analysis, and interpretation; T.K. provided samples and performed the IHC analysis; T.M. performed data and statistical analysis and assisted in data interpretation; N.S, A.A. provided patient samples; E.P. assisted in data interpretation and revised the manuscript; A.S.T. and K.S. designed and supervised the research and wrote the manuscript.
