# Supplementary material for: Stem cell factor is implicated in microenvironmental interactions and cellular dynamics of chronic lymphocytic leukemia
Source: PubMed Central journal article supplement — Haematologica. 2020 Mar 26;106(3):692–700. doi: 10.3324/haematol.2019.236513 (PMC7927890; doi:10.3324/haematol.2019.236513), 2020-03-26
Supplement: 2019_236513_GAVRILLDIS_SUPPL.pdf [file 2019_236513_GAVRILLDIS_SUPPL.pdf]

## Stem cell factor is implicated in microenvironmental interactions and cellular dynamics of chronic lymphocytic leukemia

George I. Gavriilidis,<sup>1\*</sup> Stavroula Ntoufa,<sup>2\*</sup> Nikos Papakostantinou,<sup>2</sup> Konstantia Kotta,<sup>2</sup> Triantafyllia Koletsa,<sup>3</sup> Elisavet Chartomatsidou,<sup>2</sup> Theodoros Moysiadis,<sup>2,4</sup> Niki Stavroyianni,<sup>5</sup> Achilles Anagnostopoulos,<sup>5</sup> Eleni Papadaki,<sup>6</sup> Asterios S. Tsiftoglou<sup>1</sup> and Kostas Stamatopoulos<sup>2,4</sup>

<sup>1</sup>Laboratory of Pharmacology, School of Pharmacy, Aristotle University of Thessaloniki, Thessaloniki, Greece; <sup>2</sup>Institute of Applied Biosciences, Centre for Research and Technology Hellas, Thessaloniki, Greece; <sup>3</sup>Department of Pathology, Faculty of Medicine, Aristotle University, Thessaloniki, Greece; <sup>4</sup>Department of Molecular Medicine and Surgery, Karolinska Institute, Stockholm, Sweden; <sup>5</sup>Hematology Department and HCT Unit, G. Papanicolaou Hospital, Thessaloniki, Greece and <sup>6</sup>Department of Medicine, University of Crete, Heraklion, Greece

*\*GIG and SN contributed equally as co-first authors.*

©2021 Ferrata Storti Foundation. This is an open-access paper. doi:10.3324/haematol.2019.236513

Received: August 29, 2019.

Accepted: March 24, 2020.

Pre-published: March 26, 2020.

Correspondence: **KOSTAS STAMATOPOULOS** - [kostas.stamatopoulos@certh.gr](mailto:kostas.stamatopoulos@certh.gr)

---

## SUPPLEMENTARY METHODS

### B cell enrichment

CD19<sup>+</sup> B cells were negatively selected from whole blood or tonsils using the RosetteSep B-cell enrichment kit (StemCell Technologies, Vancouver, BC, Canada) as previously described.<sup>1</sup> The purity of all preparations was checked by flow cytometry and always exceeded 95% for CD19<sup>+</sup> cells.

### Quantification of SCF and c-kit mRNA expression

Quantification of *KITLG* and *KIT* mRNA levels was achieved by RQ-PCR (ThermoFisher Scientific) using specific primers (Kicqstart™ Primers, Sigma-Aldrich) for each splice variant. Briefly, one microgram of RNA was reversed transcribed to cDNA and a 3:50 aliquot of the RT product was used as the template for RQ-PCR. The  $\beta_2$  microglobulin (B2M) gene was used as reference gene.<sup>2</sup> For RQ-PCR experiments all samples were run in duplicate. Data was analyzed using the 2- $\Delta\Delta$ Ct algorithm.<sup>3</sup>

### Western blotting for the detection of SCF and HIF-1 $\alpha$ protein expression

Total cellular protein was isolated from purified B cells. Cells were washed twice with ice-cold phosphate-buffered saline and lysed with Pierce® RIPA Lysis and Extraction Buffer (ThermoFisher Scientific). Protein lysates were quantified using Pierce™ BCA Protein Assay Kit (ThermoFisher Scientific). 15 micrograms of protein were run on a 10% acrylamide SDS-PAGE gel under denaturing and reducing conditions and then transferred to PVDF membranes. Immunoblot analysis was performed using (a) rabbit anti-SCF monoclonal antibody which recognizes both SCF isoforms (KL-1/KL-2), (b) anti-SCF polyclonal antibody which recognizes the KL-1 isoform (Abcam), (c) goat anti-rabbit IgG H&L (HRP) antibody (Abcam), (d) anti-hypoxia inducible factor 1 $\alpha$  (HIF-1 $\alpha$ ) mouse monoclonal antibody and (e) goat anti-mouse IgG H&L (HRP) antibody (R&D Systems) (**Supplemental Table 3**). To ensure equal loading, membranes were stripped and reprobed with monoclonal anti- $\beta$ -actin-peroxidase antibody (Merck) and MagicMark™ XP (ThermoFisher Scientific) as a protein standard for molecular weight estimation. Chemiluminescent detection of the proteins of interest was performed with Luminata™ Classico Western HRP Substrate (Merck) and visualized with GeneGnome (Syngene) imaging system. Ratios of SCF protein band intensity relative to  $\beta$ -actin band intensity were calculated for each sample using the ImageJ software (<http://rsbweb.nih.gov/ij/>).

### **Cell culture conditions**

Primary CLL cells and the HS-5 human bone marrow stromal cells cell line (ATCC® CRL-11882™) were cultured at 37°C in 5% CO<sub>2</sub> atmosphere in RPMI 1640 supplemented with GlutaMAX™ Supplement (ThermoFisher Scientific) and 10% heat-inactivated fetal bovine serum (FBS) and 50µg/mL penicillin/streptomycin. For the short term co-cultures, HS-5 cells were seeded at a concentration of 5x10<sup>4</sup>/ml/well in a 24-well plate. 48 hours later, the confluence of the mesenchymal feeder layer was assessed by phase contrast microscopy and provided that it exceeded ~80%, 3x10<sup>6</sup> primary CLL cells were then added (ratio of 60:1 based on initial HS-5 seeding). For the long term co-cultures, HS-5 cells were seeded at a concentration of 5x10<sup>4</sup>/ml/well in a 24-well plate and 15 hours later 3x10<sup>6</sup> CLL cells were added. Cells were harvested at the indicated time points (24 hours or 72 hours from the addition of CLL cells) with mild trypsinization (ThermoFisher Scientific). Single cultures of primary CLL cells at a concentration of 3x10<sup>6</sup> cells/ml were set-up as untreated controls.

Stimulation of the primary CLL cells was performed with goat F(ab)<sub>2</sub> anti-human IgM or IgG Abs (10 or 20 µg/ml respectively for 3-6-24 hours; ThermoFisher Scientific) for the BcR; CpG ODN (2.5 µg/ml for 24-72 hours; ODN2006, Invivogen) for TLR9; and, CD40L/Enhancer (0.1/1 µg/ml for 24-72 hours; ALX-850-064-KI01, Enzo Life Sciences) for CD40. For oxidation experiments, primary CLL cells were incubated with 10 mM H<sub>2</sub>O<sub>2</sub> for 24 hours.

### **Flow cytometry studies**

Flow cytometry was used for the assessment of cell viability, apoptosis, mitochondrial mass, membrane potential and intracellular expression of SCF, HIF-1α and Ki-67. All primary cell samples were stained for surface CD19 (PE-Cy™5 mouse anti-human CD19 antibody, BD) and viability (Fixable Viability Stain 660/FVS660; BD) prior to intracellular staining of SCF and Ki-67 (rabbit anti-SCF monoclonal antibody, monoclonal rabbit IgG, as isotypic control and goat anti-rabbit IgG H&L PE-labeled antibody (Abcam) or FITC-labeled antibody (ThermoFisher Scientific) and anti-Ki-67 Set (BD). Intracellular staining of HIF-1α was performed with monoclonal mouse anti-HIF-1α antibody (R&D Systems) and anti-mouse IgG H&L FITC-labeled antibody (ThermoFisher Scientific) (**Supplemental Table 3**).

Intracellular staining was achieved with the Fixation/Permeabilization Solution Kit (Beckton Dickinson) following the manufacturer's instructions. Apoptotic primary CLL cells were determined using the Annexin V – FITC Assay kit (Exbio).

The determination of mitochondrial mass in primary CLL cells was performed using MitoTracker™ Green FM (ThermoFisher Scientific). The determination of mitochondrial

membrane potential in primary CLL cells was performed using MitoTracker™ Red CMXRos (ThermoFisher Scientific).

In all measurements, 10,000 events were acquired on a BD FACS Calibur flow cytometer. Analysis of raw data followed using the FlowJo software (BD). The gating strategy for all analyses included the exclusion of dead cells on a SSC/FVS plot and detection of CD19<sup>+</sup> cells on a SSC/CD19-PE-Cy5.5 plot.

### **Immunohistochemistry studies-details for samples**

From the archives of the Pathology Department, Aristotle University of Thessaloniki, we randomly selected six cases of bone marrow biopsies and seven cases of lymph nodes, previously diagnosed with CLL infiltration, according to World Health Organization Classification of Tumors of the Hematopoietic and Lymphoid Tissues. All cases represented de novo CLL diagnoses. In two cases, concurrent bone marrow and lymph node biopsies were available. In addition, three cases of lymph nodes with histological findings of reactive lymphadenitis and one case of bone marrow biopsy with non-specific, reactive features were included in the study. All specimens were fixed in 10% neutral-buffered formalin. Bone marrow biopsies were decalcified in an EDTA-based solution.

### **Survival analysis**

Firstly, time-dependent Receiver Operating Characteristic (ROC) curve analysis was used to assess the diagnostic accuracy of the SCF, measured at baseline (date of diagnosis) on overall survival (OS) and time-to-first-treatment (TTFT).<sup>4</sup> To detect the most appropriate threshold within SCF, and to accommodate the time effect at the same time, different time points from date of diagnosis were evaluated. In particular the time points 50, 100, 150, 200 and 258 months were considered, and the most appropriate threshold was recorded in each case, based on the minimum distance criterion. An overall threshold was then selected, based on an overall assessment of the derived thresholds at the different time points. The analysis was performed in R based on the package “tdROC”, which calculates the time-dependent sensitivity, specificity and area under the curve using a nonparametric weighting adjustment.<sup>5</sup> Furthermore, a bootstrapping procedure was applied to validate the stability of the detected threshold. Particularly, 10000 bootstrap samples, which were equal in size to the originally selected population, were randomly generated with replacement from the originally selected CLL population. Subsequently, for each bootstrap sample, the same procedure based on the time-dependent ROC analysis was applied. The derived thresholds in each case were recorded

resulting in the threshold distribution for each time point. This enabled us to evaluate/validate the thresholds detected in the originally selected CLL population. The percentages observed for the original thresholds were both for the TTFT and the OS the prevalent percentages with markedly difference from all the other thresholds considered, thus signifying their predominance and validating the original selection. Finally, the Harrell's concordance index was calculated for each multivariable Cox model to assess the discriminatory ability of the Cox model.<sup>6</sup>

## SUPPLEMENTARY FIGURES

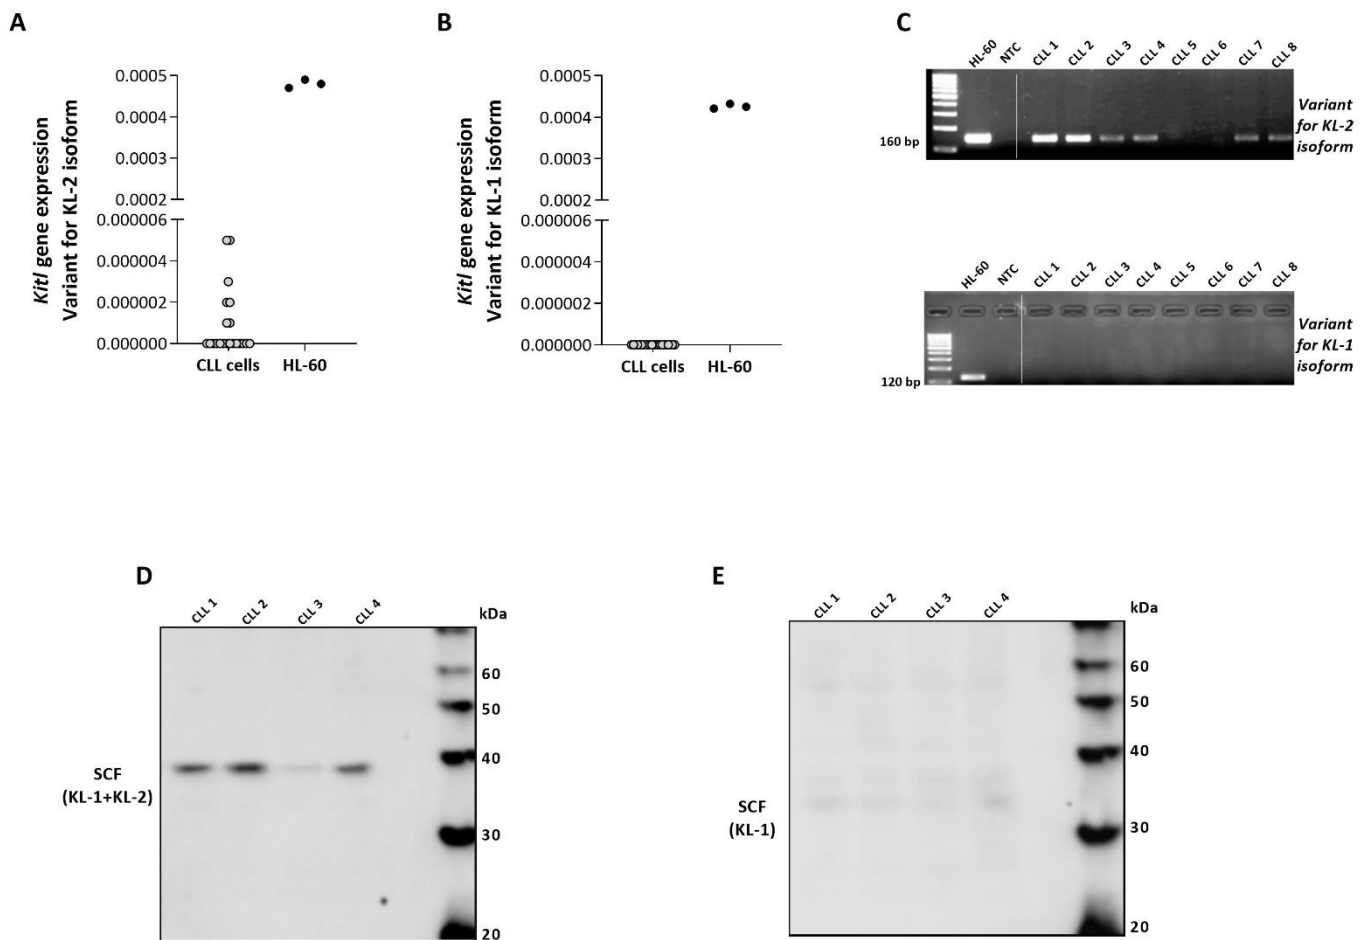

**Supplementary Figure 1: (A-C)** RQ-PCR analysis for the expression of the *KITLG* gene splice variants in CLL cells. The promyelocytic leukemia cell line HL-60 was used as a positive control. In (C), representative agarose gel with the products of the RQ-PCR experiments. **(D)** Representative Western Blot of the protein expression of total SCF protein levels (KL-1+KL-2 isoforms, 37 kDa) in CLL cells. **(E)** Representative Western Blot of the SCF isoform KL-1 in CLL cells (32 kDa).

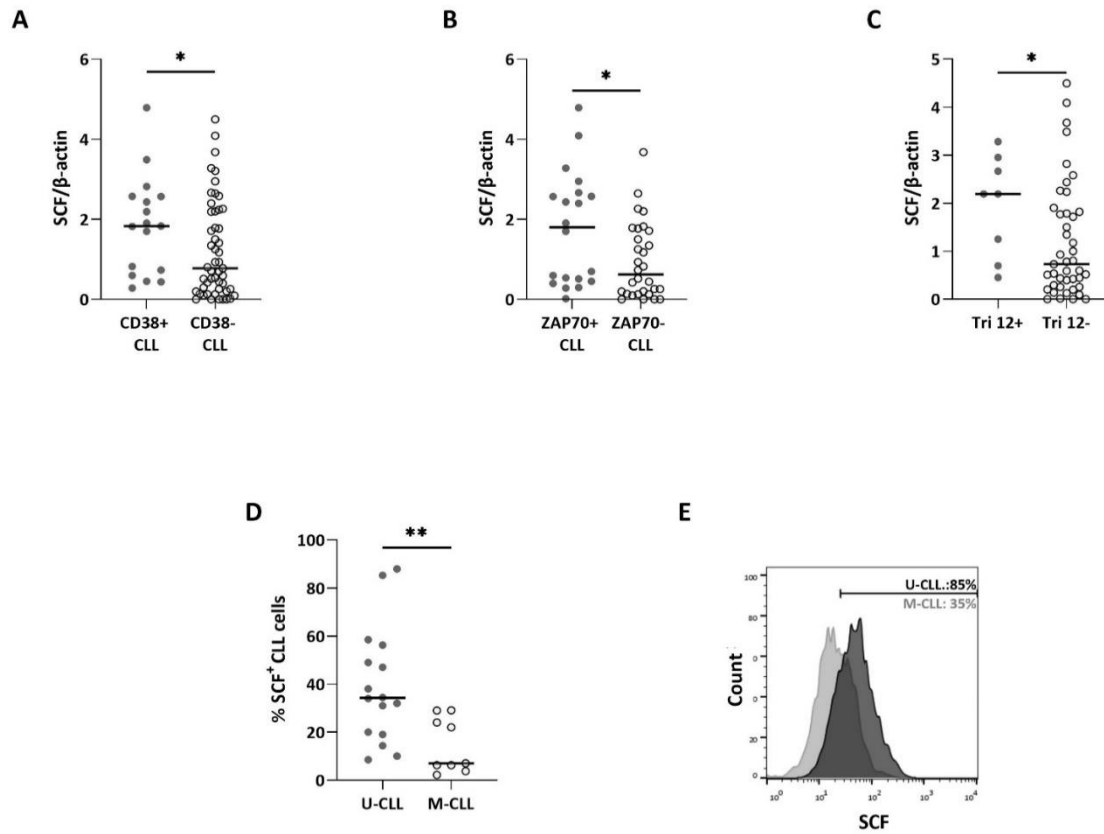

**Supplementary Figure 2: (A-C)** SCF is overexpressed in CD38<sup>+</sup>, ZAP70<sup>+</sup> and Trisomy 12<sup>+</sup> (Tri12<sup>+</sup>) CLL cases. The dot plot shows normalized SCF protein levels to β-actin from Western Blot studies and each dot represents one case. **(D)** Comparison of SCF positive cells (flow cytometry for viable/SCF<sup>+</sup> CLL cells) from U-CLL and M-CLL cases. **(E)** Representative histogram from Flow Cytometry analysis depicting SCF<sup>+</sup> cells in one U-CLL and one M-CLL case. The significant difference was analyzed by the Mann–Whitney U test; \*p<0.05, \*\*\*p<0.001.

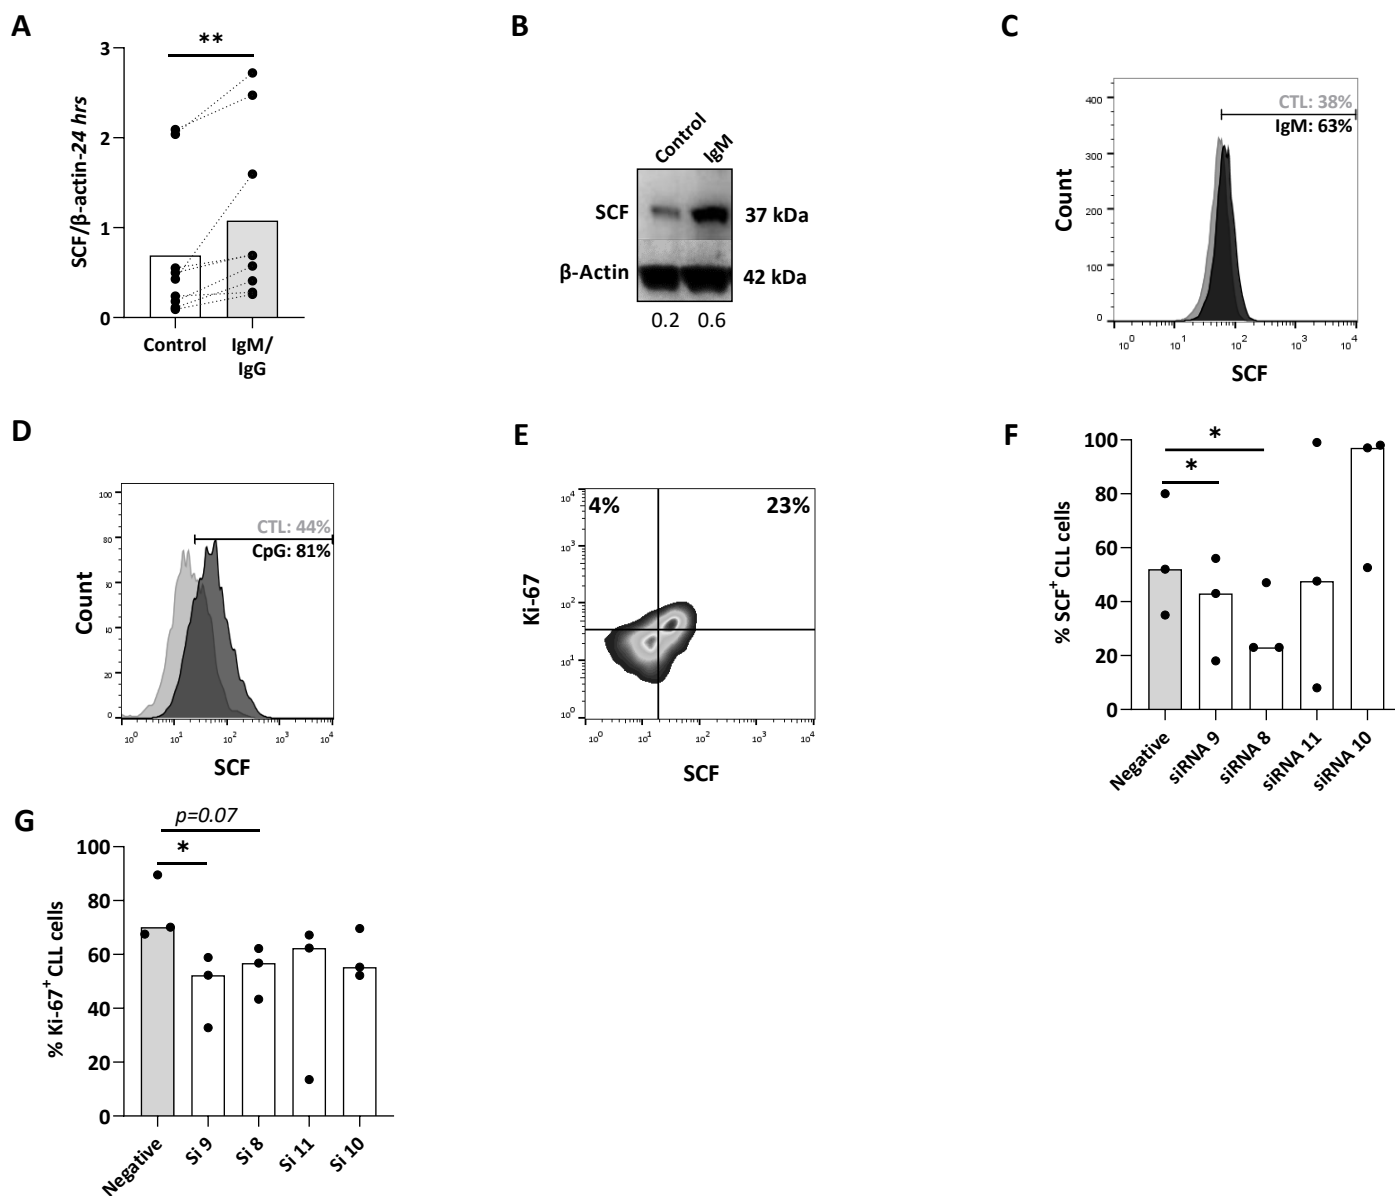

**Supplementary Figure 3:** (A) Comparison of SCF protein expression (Western blot analysis) from untreated (Control) and Ig-stimulated U-CLL cells; SCF protein levels were normalized to β-actin. (B) Representative Western blot for SCF protein levels in a single CLL case for untreated (Control) and stimulated U-CLL cells. (C) Representative histogram from flow cytometry analysis for SCF+ cells in untreated (Control) and IgM-stimulated U-CLL cells. (D) Representative histogram from flow cytometry analysis for SCF+ cells in untreated (Control) and CpG-stimulated U-CLL cells. (E) Representative dot plot from flow cytometry analysis showing proliferating (Ki-67<sup>+</sup>) and SCF<sup>+</sup> CLL cells. Interconnected dots represent one case in two different conditions while bars represent median values. The Wilcoxon P test was applied to evaluate statistical significance; \*p<0.05, \*\*p<0.01, \*\*\*p<0.001. FD: Fold Difference

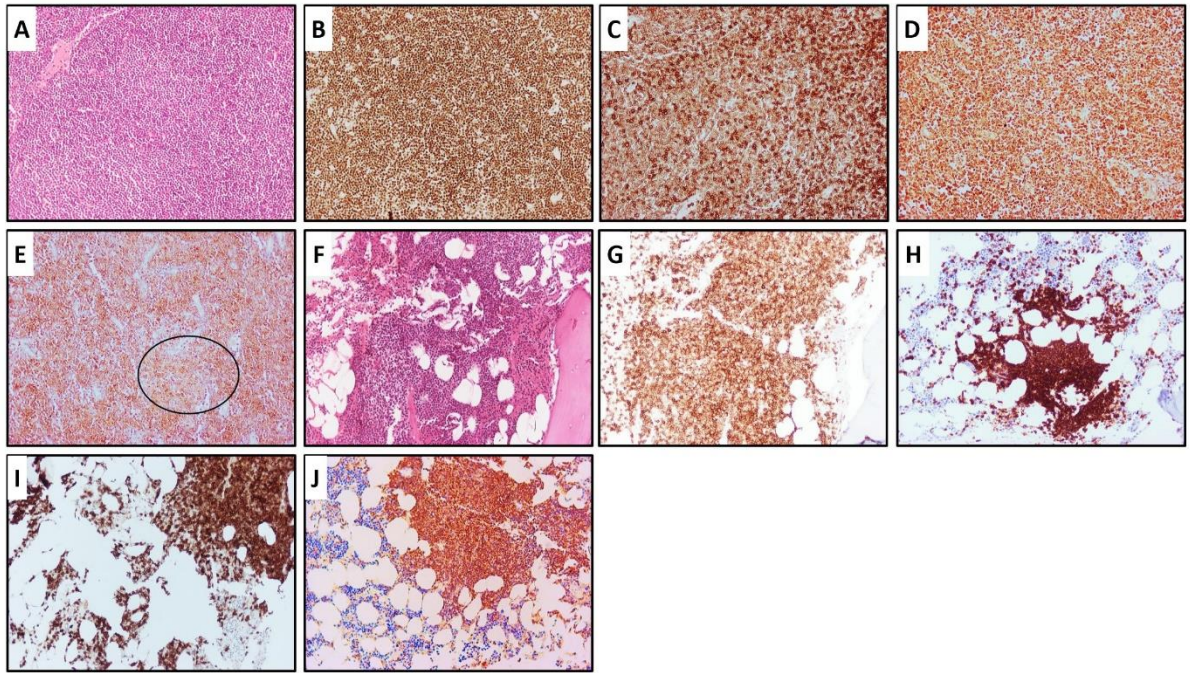

**Supplementary Figure 4: (A-E)** A case of lymph node infiltrated by CLL cells (A), being positive for PAX5 (B), CD5 (C), CD23 (D) and SCF (E). The black circle designates a proliferation center of CLL cells in the lymph node microenvironment. **(F-J)** A case of bone marrow infiltration by CLL cells. The neoplastic lymphoid cells are of small size and monomorphic (F) presenting positivity to CD20 (G), CD5 (H), CD23 (I) and SCF (J). (A,F: HEX200; B-F IHC X200).

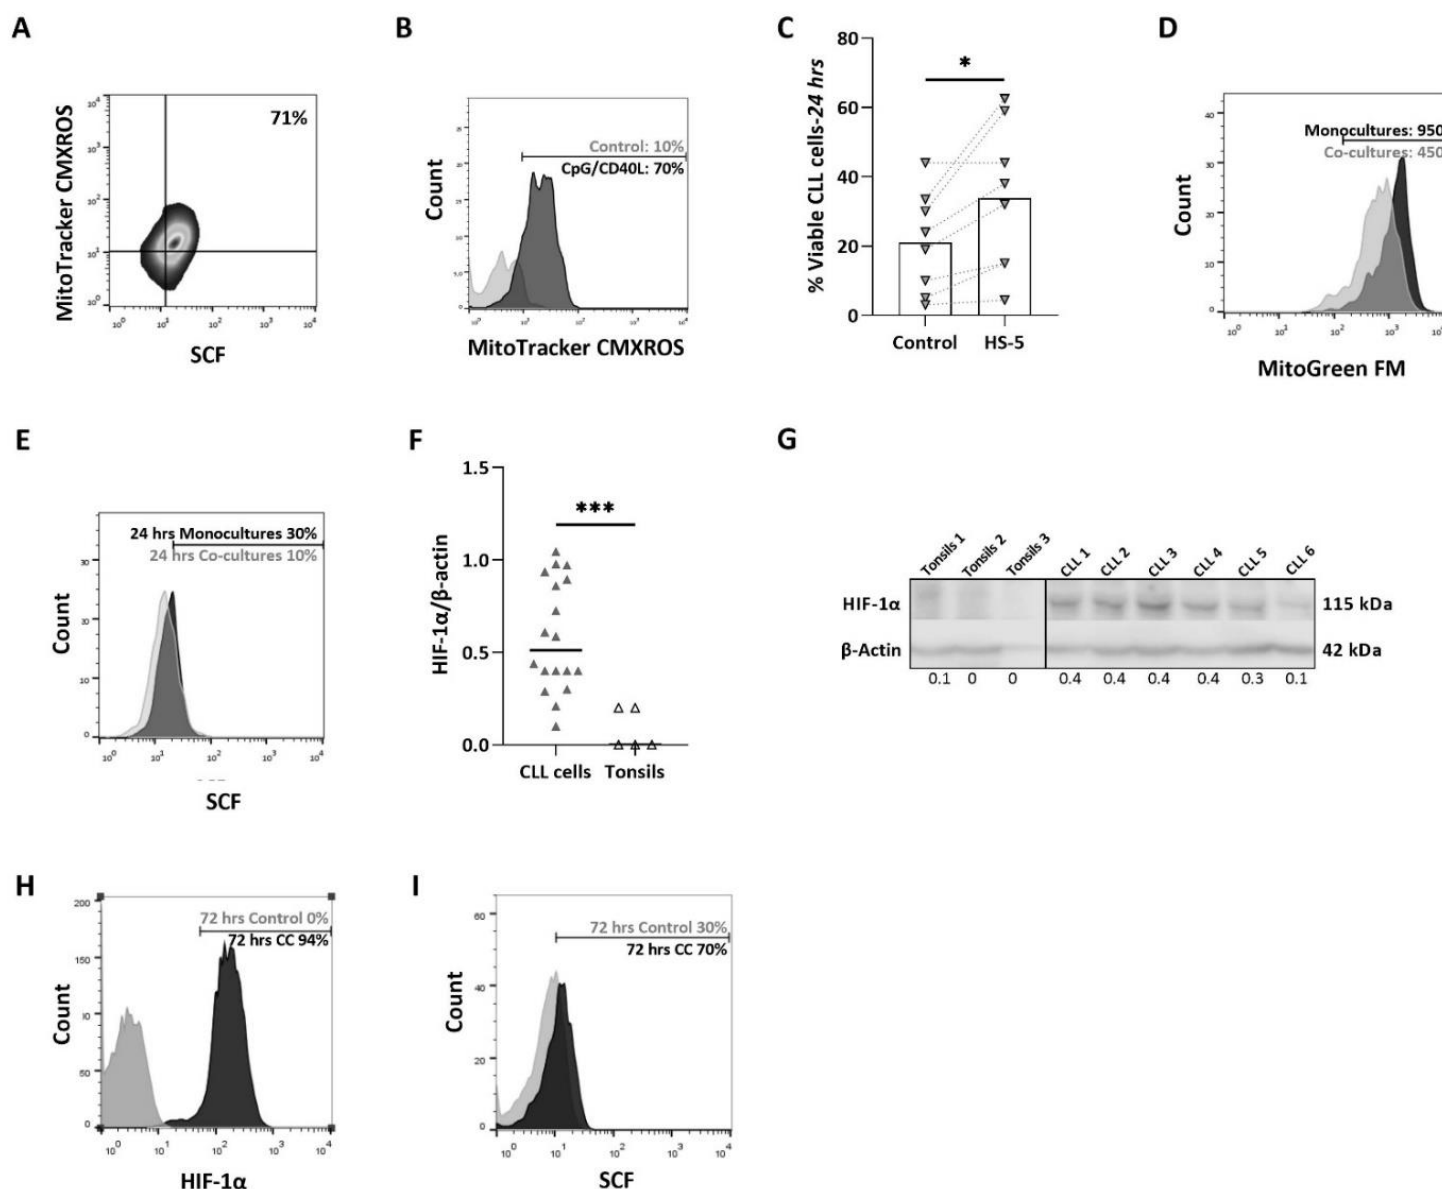

**Supplemental Figure 5:** (A) Representative dot plot from flow cytometry analysis showing CpG-stimulated CLL cells with active membrane potential and SCF positivity (B) Representative histograms from flow cytometry experiments showing the membrane potential of untreated (controls) and CpG/CD40L-stimulated cells for 1 CLL case (C) Viability of CLL cells co-cultured with the mesenchymal HS-5 cells for 24 hours: flow cytometry analysis of Annexin<sup>-</sup>/PI<sup>+</sup> CLL cells. Interconnected dots represent one case in two different conditions while bars represent median values. (D) Representative histogram from flow cytometry analysis showing the mitochondrial mass of monocultured (black) and co-cultured CLL cells with the mesenchymal HS-5 cells (grey) for 24 hours. (E) Representative histogram from flow cytometry analysis

showing SCF positivity in monocultured (black) and co-cultured CLL cells with the mesenchymal HS-5 cells (grey) for 24 hours. **(F)** Comparison of HIF-1 $\alpha$  protein expression in CLL cells versus healthy tonsillar B cells. The dot plot shows HIF-1 $\alpha$  protein levels normalized to  $\beta$ -actin from Western blot studies and each dot represents one case. **(G)** Representative Western Blot for the distinct HIF-1 $\alpha$  probing in samples from healthy tonsils and CLL cases. **(H-I)** Representative histograms from flow cytometry analysis showing HIF-1 $\alpha$  and SCF positivity respectively in monocultured (grey) and co-cultured CLL cells with the mesenchymal HS-5 cells (grey) for 72 hours. Interconnected dots represent one case in two different conditions while bars represent median values. The Wilcoxon P test was applied to evaluate statistical significance; \* $p < 0.05$ , \*\* $p < 0.01$ , \*\*\* $p < 0.001$  in 5C. The significant difference was analyzed by the Mann–Whitney U test; \* $p < 0.05$ , \*\*\* $p < 0.001$  in 5F FD: Fold Difference

**A**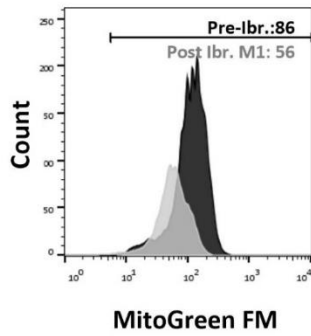**B**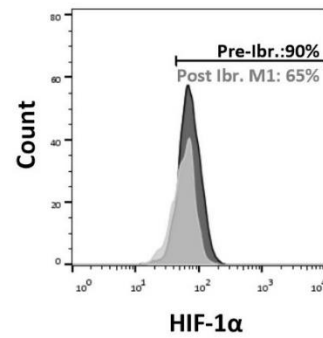**C**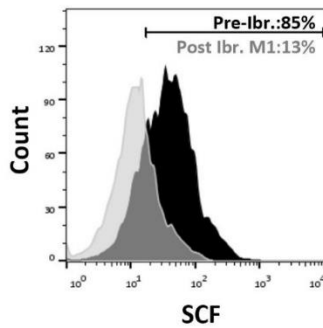**D**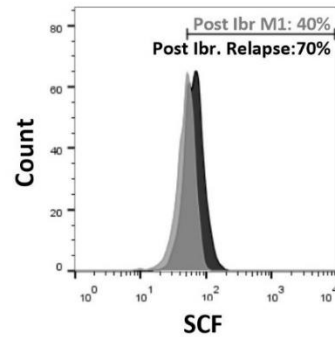

**Supplemental Figure 6: (A-C)** Representative histograms from flow cytometry analysis of mitochondrial mass (A), HIF-1a positivity (B) and SCF positivity (C) in CLL samples before (black) and 1 month under Ibrutinib therapy (grey). **(D)** Representative histogram from flow cytometry analysis of SCF positivity in CLL samples 1 month under Ibrutinib therapy and at the point of relapse (black).

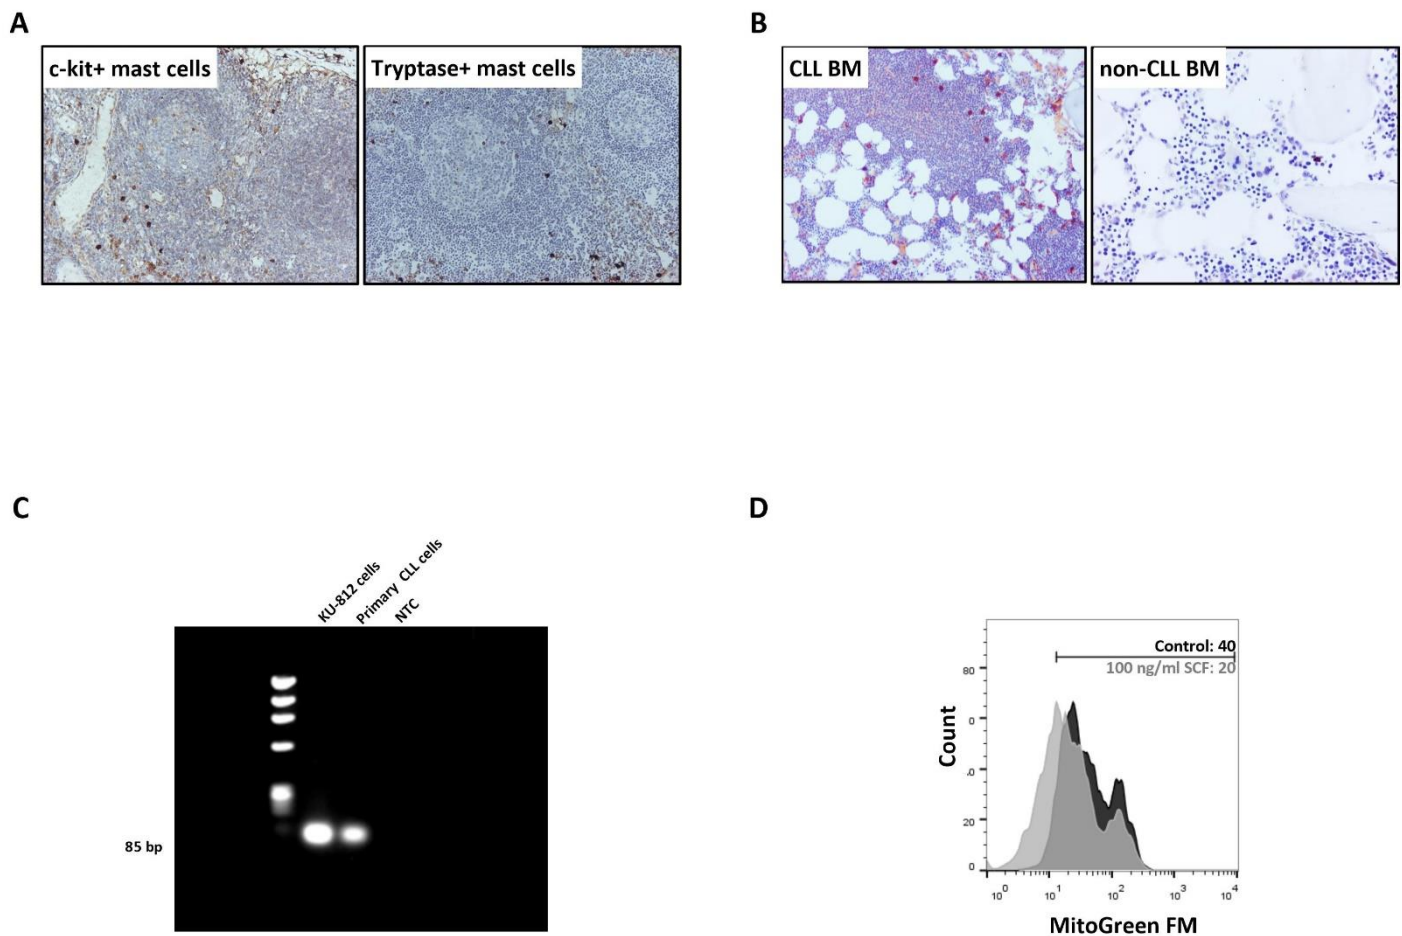

**Supplemental Figure 7: (A)** Lymph nodes presenting scattered c-Kit positive cells proven to be mast cells in tryptase immunostain. **(B)** Infiltrating c-Kit positive mast cells in a CLL bone marrow and in reactive, non-CLL bone marrow (IHC X200). **(C)** Representative agarose electrophoresis of the RQ-PCR products regarding the expression of the *KIT* gene in CLL cells. KU-812 chronic myelogenous leukemia cell line was used as a positive control. **(D)** Representative histogram from flow cytometry analysis depicting the mitochondrial mass of untreated CLL cells (black) or treated with 100 ng/ml SCF (grey) for 48 hours.

## SUPPLEMENTARY TABLES

**Supplementary Table 1.** Demographic, clinical and biological data for studies associating SCF protein expression to risk factors

| Patient id | Age at diagnosis | Sex | Rai at diagnosis | Binet at diagnosis | Surface IGH isotype | Surface CD38 | Intracellular ZAP-70 | Karyotype                                                                                    | FISH trisomy 12 | Progression | OS (Months) | TTFT (Months) | Mutational status of IGHV genes |
|------------|------------------|-----|------------------|--------------------|---------------------|--------------|----------------------|----------------------------------------------------------------------------------------------|-----------------|-------------|-------------|---------------|---------------------------------|
| P10029     | 57               | F   | I                | A                  | MD                  | POSITIVE     | POSITIVE             | 46,X,-X,+12[13]/46,XX[7]                                                                     | POSITIVE        | PROGRESSIVE | 139         | 83            | UNMUTATED                       |
| P10343     | 70               | F   | 0                | A                  | D                   | NEGATIVE     | NEGATIVE             | 46,XX[25]                                                                                    | NEGATIVE        | STABLE      | 72          | 72            | MUTATED                         |
| P10393     | 55               | M   | 0                | A                  | MD                  | NEGATIVE     | NEGATIVE             | 46,XY[20]                                                                                    | NEGATIVE        | STABLE      | 87          | 87            | MUTATED                         |
| P1050      | 65               | F   | n/a              | n/a                | G                   | POSITIVE     | N/A                  | 46,XX,t(9;13)(p21;q14),del(17)(p13)[6]/46,XX[10]                                             | NEGATIVE        | PROGRESSIVE | 70          | 4             | UNMUTATED                       |
| P10635     | 57               | M   | I                | A                  | MD                  | NEGATIVE     | NEGATIVE             | 46,XY,idic(21)(p11)[3]/45,sl,der(14)t(6;14)(p11;p11),-15[15]/45,sld,del(11)(q23)[2]/46,XY[6] | NEGATIVE        | STABLE      | 74          | 74            | UNMUTATED                       |
| P10650     | 64               | M   | I                | A                  | MD                  | NEGATIVE     | NEGATIVE             | 46,XY[20]                                                                                    | NEGATIVE        | PROGRESSIVE | 35          | 14            | UNMUTATED                       |
| P10722     | 69               | M   | 0                | A                  | N/A                 | NEGATIVE     | NEGATIVE             | 46,XY,9q+[28]                                                                                | NEGATIVE        | STABLE      | 77          | 77            | MUTATED                         |
| P11330     | 59               | F   | I                | A                  | MD                  | NEGATIVE     | NEGATIVE             | 46,XX[20]                                                                                    | NEGATIVE        | STABLE      | 77          | 77            | MUTATED                         |

| Patient id | Age at diagnosis | Sex | Rai at diagnosis | Binet at diagnosis | Surface IGH isotype | Surface CD38 | Intracellular ZAP-70 | Karyotype                                                                         | FISH trisomy 12 | Progression | OS (Months) | TTFT (Months) | Mutational status of IGHV genes |
|------------|------------------|-----|------------------|--------------------|---------------------|--------------|----------------------|-----------------------------------------------------------------------------------|-----------------|-------------|-------------|---------------|---------------------------------|
| P1156      | 64               | F   | II               | A                  | M                   | POSITIVE     | POSITIVE             | 47,XX,inv(9)(p13q22),+12[3]/47,XX,t(1;13)(p12;q12),inv(9)(p13q22)+12[3]/46,XX[24] |                 | PROGRESSIVE | 167         | 113           | MUTATED                         |
| P1173      | 63               | F   | I                | A                  | MD                  | NEGATIVE     | POSITIVE             | 46,XX[20]                                                                         | POSITIVE        | PROGRESSIVE | 166         | 14            | UNMUTATED                       |
| P11778     | 51               | M   | 0                | A                  | MD                  | NEGATIVE     | NEGATIVE             | 46,XY[20]                                                                         | NEGATIVE        | STABLE      | 52          | 52            | MUTATED                         |
| P1188      | 59               | M   | II               | B                  | MD                  | NEGATIVE     | NEGATIVE             | 46,XY[20]                                                                         | NEGATIVE        | STABLE      | 168         | 168           | MUTATED                         |
| P12206     | 66               | M   | I                | A                  | MD                  | NEGATIVE     | N/A                  | N/A                                                                               | N/A             | PROGRESSIVE | 64          | 56            | UNMUTATED                       |
| P12261     | 67               | M   | 0                | A                  | MD                  | NEGATIVE     | NEGATIVE             | 46,XY[20]                                                                         | NEGATIVE        | STABLE      | 59          | 59            | MUTATED                         |
| P12452     | 56               | F   | I                | A                  | MD                  | NEGATIVE     | NEGATIVE             | N/A                                                                               | NEGATIVE        | PROGRESSIVE | 81          | 62            | MUTATED                         |
| P1615      | 62               | F   | 0                | A                  | G                   | NEGATIVE     | POSITIVE             | 47,XX,+12[28]/47,sl,del(6)(q31q35)[1]/46,XX[14]                                   | POSITIVE        | PROGRESSIVE | 185         | 93            | UNMUTATED                       |
| P18780     | 61               | F   | 0                | A                  | M                   | NEGATIVE     | POSITIVE             | 46,XX[20]                                                                         | NEGATIVE        | PROGRESSIVE | 70          | 35            | UNMUTATED                       |
| P1894      | 53               | M   | 0                | A                  | M                   | NEGATIVE     | N/A                  | 46,XY[20]                                                                         | NEGATIVE        | STABLE      | 161         | 1             | MUTATED                         |
| P21610     | 47               | M   | I                | A                  |                     | N/A          | N/A                  | 46,XY[47]                                                                         | NEGATIVE        | PROGRESSIVE | 162         | 29            | UNMUTATED                       |
| P21735     | 62               | F   | II               | B                  | MD                  | NEGATIVE     | N/A                  | 46,XX,t(14;22)(q34;q11)[6]/46XX[22]                                               | NEGATIVE        | PROGRESSIVE | 14          | 13            | UNMUTATED                       |
| P22054     | 74               | F   | 0                | A                  | MD                  | NEGATIVE     | N/A                  | 46,XX,del(11)(q23q24)[8]/46,XX[12]                                                | NEGATIVE        | STABLE      | 21          | 21            | UNMUTATED                       |

| Patient id | Age at diagnosis | Sex | Rai at diagnosis | Binet at diagnosis | Surface IGH isotype | Surface CD38 | Intracellular ZAP-70 | Karyotype                                                                    | FISH trisomy 12 | Progression | OS (Months) | TTFT (Months) | Mutational status of IGHV genes |
|------------|------------------|-----|------------------|--------------------|---------------------|--------------|----------------------|------------------------------------------------------------------------------|-----------------|-------------|-------------|---------------|---------------------------------|
| P22210     | 63               | M   | II               | B                  | MD                  | NEGATIVE     | N/A                  | 46,XY, del(17)(p13)[3]/45, X,-Y[3]/46,XY[24]                                 | N/A             | PROGRESSIVE | 26          | 2             | UNMUTATED                       |
| P2355      | 54               | M   | II               | A                  | MD                  | NEGATIVE     | POSITIVE             | 46,XY[20]                                                                    | N/A             | PROGRESSIVE | 71          | 62            | UNMUTATED                       |
| P2446      | 73               | M   | 0                | A                  | G                   | POSITIVE     | N/A                  | 47,XY,+12[2]/46,XY[24]                                                       | POSITIVE        | PROGRESSIVE | 101         | 62            | UNMUTATED                       |
| P2512      | 54               | F   | I                | A                  | MD                  | POSITIVE     | POSITIVE             | 43-45,XX,add(2)(q2?7),t(8;17)(p2?3;q11),-13,-17,-18,+mar[cp9]/46,XX[15]      | NEGATIVE        | PROGRESSIVE | 247         | 41            | UNMUTATED                       |
| P2528      | 52               | F   | I                | A                  | f                   | NEGATIVE     | NEGATIVE             | 46,XX                                                                        | N/A             | STABLE      | 146         | 146           | MUTATED                         |
| P2548      | 69               | M   | I                | A                  | MD                  | NEGATIVE     | N/A                  | 46,X,t(Y;11)(q12;q23),del(13)(q12q14)[11]/46,XY,t(3;5)(q29;q23)[2]/46,XY[25] | N/A             | PROGRESSIVE | 66          | 16            | UNMUTATED                       |
| P280       | 60               | M   | 0                | A                  | MD                  | NEGATIVE     | N/A                  | 46,XY,t(9;12)(q12;p11)[3]/46,XY[22]                                          | N/A             | STABLE      | 171         | 171           | MUTATED                         |
| P3041      | 65               | M   | II               | A                  | MD                  | NEGATIVE     | N/A                  | 46,XY[20]                                                                    | NEGATIVE        | PROGRESSIVE | 141         | 19            | UNMUTATED                       |
| P3123      | 80               | F   | I                | A                  | MD                  | NEGATIVE     | NEGATIVE             | 46,XX[20]                                                                    | NEGATIVE        |             | 114         | 114           | MUTATED                         |
| P32166     | 75               | M   | 0                | A                  | MD                  | NEGATIVE     | N/A                  | 46,XX[20]                                                                    | NEGATIVE        | STABLE      | 2           | 2             | MUTATED                         |
| P3255      | 81               | M   | II               | B                  | MD                  | POSITIVE     | N/A                  | 46,XY[20]                                                                    | N/A             | PROGRESSIVE | 90          | 2             | UNMUTATED                       |

| Patient id   | Age at diagnosis | Sex | Rai at diagnosis | Binet at diagnosis | Surface IGH isotype | Surface CD38 | Intracellular ZAP-70 | Karyotype                                                  | FISH trisomy 12 | Progression | OS (Months) | TTFT (Months) | Mutational status of IGHV genes |
|--------------|------------------|-----|------------------|--------------------|---------------------|--------------|----------------------|------------------------------------------------------------|-----------------|-------------|-------------|---------------|---------------------------------|
| P3492        | 39               | M   | I                | A                  | G                   | POSITIVE     | N/A                  | 46,XY[20]                                                  | NEGATIVE        | PROGRESSIVE | 143         | 34            | UNMUTATED                       |
| P3551        | 59               | F   | 0                | A                  | G                   | NEGATIVE     | N/A                  | 46,XX[20]                                                  | NEGATIVE        | STABLE      | 259         | 259           | MUTATED                         |
| P3810        | 66               | M   | II               | A                  | MD                  | POSITIVE     | POSITIVE             | 46,XY,del(10)(q22q24)[9]/46,XY[16]                         | N/A             | PROGRESSIVE | 101         | 1             | UNMUTATED                       |
| P3916        | 43               | M   | 0                | A                  | G                   | NEGATIVE     | NEGATIVE             | 46,XY[20]                                                  | N/A             | STABLE      | 131         | 131           | MUTATED                         |
| P4438        | 75               | F   | 0                | A                  | MD                  | NEGATIVE     | NEGATIVE             | 46,XX[20]                                                  | NEGATIVE        | STABLE      | 93          | 13            | MUTATED                         |
| P4557        | 58               | F   | 0                | A                  | MD                  | NEGATIVE     | NEGATIVE             | 45,X,-X,inv(9)(p11q13)[3]/46,XX,inv(9)(p11q13)[17]         | NEGATIVE        | STABLE      | 146         | 146           | MUTATED                         |
| P4994        | 68               | M   | 0                | A                  | M                   | NEGATIVE     | NEGATIVE             | 46,XY[20]                                                  | NEGATIVE        | PROGRESSIVE | 121         | 93            | MUTATED                         |
| P5063        | 59               | M   | I                | A                  | G                   | NEGATIVE     | NEGATIVE             | 46,XY[20]                                                  | POSITIVE        | STABLE      | 156         | 156           | UNMUTATED                       |
| P511         | 64               | M   | II               | B                  | MD                  | NEGATIVE     | N/A                  | N/A                                                        | N/A             | PROGRESSIVE | 95          | 40            | UNMUTATED                       |
| P5231        | 57               | M   | II               | B                  | MD                  | POSITIVE     | NEGATIVE             | 46,XY[20]                                                  | NEGATIVE        | PROGRESSIVE | 93          | 30            | UNMUTATED                       |
| <b>P5283</b> | 61               | M   | I                | A                  | MD                  | POSITIVE     | POSITIVE             | 46,XY[20]                                                  | NEGATIVE        | PROGRESSIVE | 80          | 35            | MUTATED                         |
| P5642        | 63               | M   | 0                | A                  | MD                  | NEGATIVE     | NEGATIVE             | 46,XY,der(2)t(2;?)(p15),der(13)t(13;?)(q22;?)[12]/46,XY[3] | NEGATIVE        | PROGRESSIVE | 14          | 0             | UNMUTATED                       |
| P571         | 48               | M   | 0                | A                  | MD                  | NEGATIVE     | N/A                  | 47,XY,+12[13]/46,XY[2]                                     | POSITIVE        | PROGRESSIVE | 148         | 54            | UNMUTATED                       |
| P5728        | 53               | M   | I                | A                  | MD                  | POSITIVE     | NEGATIVE             | 46,XY[20]                                                  | NEGATIVE        | STABLE      | 115         | 115           | MUTATED                         |
| P5744        | 55               | M   | 0                | A                  | MD                  | NEGATIVE     | NEGATIVE             | 46,XY[20]                                                  | NEGATIVE        | STABLE      | 110         | 110           | MUTATED                         |
| P6068        | 76               | F   | 0                | A                  | MD                  | NEGATIVE     | NEGATIVE             | N/A                                                        |                 | PROGRESSIVE | 74          | 31            | MUTATED                         |

| Patient id | Age at diagnosis | Sex | Rai at diagnosis | Binet at diagnosis | Surface IGH isotype | Surface CD38 | Intracellular ZAP-70 | Karyotype                           | FISH trisomy 12 | Progression | OS (Months) | TTFT (Months) | Mutational status of IGHV genes |
|------------|------------------|-----|------------------|--------------------|---------------------|--------------|----------------------|-------------------------------------|-----------------|-------------|-------------|---------------|---------------------------------|
| P6077      | 74               | M   | IV               | C                  | MD                  | NEGATIVE     | POSITIVE             | 46,XY,i(17)(q10)[1]/46,XY[29]       | POSITIVE        | PROGRESSIVE | 55          | 8             | UNMUTATED                       |
| P608       | 53               | M   | 0                | A                  | MD                  | NEGATIVE     | N/A                  | 46,XY[20]                           | NEGATIVE        | N/A         | 220         | 220           | MUTATED                         |
| P6124      | 69               | M   | 0                | A                  | MD                  | NEGATIVE     | NEGATIVE             | 46,XY[20]                           | NEGATIVE        | PROGRESSIVE | 114         | 47            | UNMUTATED                       |
| P6237      | 82               | F   | 0                | A                  | MD                  | NEGATIVE     | POSITIVE             | 47,XX,+12[22]/46,XX[4]              | POSITIVE        | STABLE      | 32          | 32            | UNMUTATED                       |
| P6856      | 58               | M   | 0                | A                  | MD                  | NEGATIVE     | NEGATIVE             | 46,XY,t(2;18)(p13;q23)[15]/46,XY[6] | NEGATIVE        | STABLE      | 106         | 106           | MUTATED                         |
| P7155      | 51               | M   | 0                | A                  | MD                  | NEGATIVE     | POSITIVE             | 46,XY[25]                           | NEGATIVE        | PROGRESSIVE | 105         | 82            | UNMUTATED                       |
| P7317      | 80               | M   | III              | C                  | MD                  | POSITIVE     | POSITIVE             | 46,XY[20]                           | NEGATIVE        | PROGRESSIVE | 42          | 2             | UNMUTATED                       |
| P7648      | 76               | F   | 0                | A                  | MD                  | NEGATIVE     | POSITIVE             | 46,XX,del(5)(q31q33)[7]/46,XX[23]   | NEGATIVE        | PROGRESSIVE | 39          | 3             | UNMUTATED                       |
| P7981      | 66               | M   | I                | A                  | MD                  | NEGATIVE     | NEGATIVE             | 46,XY[20]                           |                 | PROGRESSIVE | 96          | 80            | UNMUTATED                       |
| P8458      | 52               | M   | I                | A                  | G                   | NEGATIVE     | POSITIVE             | 46,XY[20]                           | NEGATIVE        | PROGRESSIVE | 106         | 48            | MUTATED                         |
| P8655      | 66               | M   | II               | B                  | MD                  | NEGATIVE     | NEGATIVE             | N/A                                 | N/A             | PROGRESSIVE | 154         | 34            | UNMUTATED                       |
| P8762      | 63               | M   | I                | A                  |                     | POSITIVE     | POSITIVE             | N/A                                 | N/A             | PROGRESSIVE | 52          | 5             | UNMUTATED                       |
| P8785      | 51               | F   | 0                | A                  | MD                  | NEGATIVE     | NEGATIVE             | 46,XX[20]                           | NEGATIVE        | STABLE      | 153         | 153           | MUTATED                         |
| P9001      | 66               | M   | I                | A                  | MD                  | NEGATIVE     | NEGATIVE             | 46,XY[20]                           | NEGATIVE        | PROGRESSIVE | 100         | 66            | UNMUTATED                       |
| P9208      | 43               | M   | I                | A                  | G                   | POSITIVE     | NEGATIVE             | 49,XY,+12,+18,+19[15]/46,XY[5]      |                 | STABLE      | 96          | 96            | MUTATED                         |
| P9391      | 84               | M   | III              | C                  | MD                  | POSITIVE     | POSITIVE             | 46,XY[20]                           | NEGATIVE        | PROGRESSIVE | 41          | 0             | MUTATED                         |

| Patient id | Age at diagnosis | Sex | Rai at diagnosis | Binet at diagnosis | Surface IGH isotype | Surface CD38 | Intracellular ZAP-70 | Karyotype                                                                        | FISH trisomy 12 | Progression | OS (Months) | TTFT (Months) | Mutational status of IGHV genes |
|------------|------------------|-----|------------------|--------------------|---------------------|--------------|----------------------|----------------------------------------------------------------------------------|-----------------|-------------|-------------|---------------|---------------------------------|
| P9548      | 68               | F   | I                | A                  | MD                  | NEGATIVE     | NEGATIVE             | 46,XX,del(11)(q14q23.1)[8]/46,sl,del(13)(q12q14)[3]/46,XX[10]                    | NEGATIVE        | PROGRESSIVE | 88          | 56            | UNMUTATED                       |
| P9605      | 71               | M   | 0                | A                  | G                   | NEGATIVE     | POSITIVE             | 46,XY[20]                                                                        | NEGATIVE        | STABLE      | 85          | 85            | MUTATED                         |
| P9709      | 53               | F   | II               | B                  | MD                  | POSITIVE     | N/A                  | 46,XX,der(4)t(3;4)9q21;p16),t(11;14)(q13;q32)[8]/46,sl,add(18)(p11)[3]/46,XX[13] | NEGATIVE        | PROGRESSIVE | 96          | 74            | UNMUTATED                       |
| P9756      | 72               | M   | I                | A                  | MD                  | NEGATIVE     | NEGATIVE             | 46,XY,del(11)(q14q23)[5]/46,sl,del(13)(q12q14)[3]/46,XY[12]                      | NEGATIVE        | PROGRESSIVE | 81          | 17            | UNMUTATED                       |
| P8071      | N/A              | M   | N/A              | N/A                | MD                  | POSITIVE     | POSITIVE             | N/A                                                                              | NEGATIVE        | N/A         | N/A         | N/A           | UNMUTATED                       |

**Supplementary table 2.** For the studies concerning the longitudinal expression profile of SCF protein expression in CLL cases under Ibrutinib therapy, we analyzed samples from a cohort of 10 CLL patients that were obtained: (a) prior to Ibrutinib therapy (Pre-Ibrutinib) and (b) 1 month after Ibrutinib therapy (Post-Ibrutinib).

| Patient id | Age at diagnosis | Sex | Rai at diagnosis | Binet at diagnosis | Surface IGH isotype | Surface CD38 | Intracellular ZAP-70 | Karyotype                                    | FISH trisomy 12 | Progression | Loss of response to Ibrutinib | TTFT (Months) | Mutational status of IGHV genes |
|------------|------------------|-----|------------------|--------------------|---------------------|--------------|----------------------|----------------------------------------------|-----------------|-------------|-------------------------------|---------------|---------------------------------|
| P21610     | 47               | M   | I                | A                  |                     | N/A          | N/A                  | 46,XY[47]                                    | NEGATIVE        | PROGRESSIVE | NO                            | 29            | UNMUTATED                       |
| P21735     | 62               | F   | II               | B                  | MD                  | NEGATIVE     | N/A                  | 46,XX,t(14;22)(q34;q11)[6]/46XX[22]          | NEGATIVE        | PROGRESSIVE | NO                            | 13            | UNMUTATED                       |
| P1173      | 63               | F   | I                | A                  | MD                  | NEGATIVE     | POSITIVE             | 46,XX[20]                                    | POSITIVE        | PROGRESSIVE | YES                           | 14            | UNMUTATED                       |
| P18780     | 61               | F   | 0                | A                  | M                   | NEGATIVE     | POSITIVE             | 46,XX[20]                                    | NEGATIVE        | PROGRESSIVE | NO                            | 35            | UNMUTATED                       |
| P12336     | 60               | M   | II               | A                  | MD                  | NEGATIVE     | NEGATIVE             | N/A                                          | NEGATIVE        | PROGRESSIVE | NO                            | 0             | UNMUTATED                       |
| P11323     | 67               | M   | 0                | A                  | MD                  | NEGATIVE     | NEGATIVE             | 46,XY[20]                                    | NEGATIVE        | PROGRESSIVE | NO                            | 2             | UNMUTATED                       |
| P9320      | 47               | M   | I                | A                  | MD                  | POSITIVE     | POSITIVE             | 46,XY[20]                                    | NEGATIVE        | PROGRESSIVE | NO                            | 5             | UNMUTATED                       |
| P7647      | 55               | M   | II               | B                  | MD                  | POSITIVE     | POSITIVE             | 46,XY,-17,+mar[5]/46,XY[20]                  | NEGATIVE        | PROGRESSIVE | NO                            | 0             | UNMUTATED                       |
| P30572     | 0                | M   | N/A              | N/A                | N/A                 | N/A          | N/A                  | N/A                                          | N/A             | N/A         | NO                            | 0             | UNMUTATED                       |
| P21499     | 61               | M   | I                | A                  | N/A                 | N/A          | N/A                  | N/A                                          | NEGATIVE        | N/A         | NO                            | 0             | UNMUTATED                       |
| P8755      | 69               | M   | II               | B                  | M                   | NEGATIVE     | POSITIVE             | 46,XY[20]                                    | NEGATIVE        | PROGRESSIVE | YES                           | 0             | UNMUTATED                       |
| P22210     | 62               | M   | II               | B                  | MD                  | NEGATIVE     | N/A                  | 46,XY, del(17)(p13)[3]/45, X,-Y[3]/46,XY[24] | N/A             | PROGRESSIVE | YES                           | 2             | UNMUTATED                       |
| P4656      | 51               |     | 0                | A                  | MD                  | NEGATIVE     | N/A                  | 46,XY[20]                                    | N/A             | PROGRESSIVE | YES                           | 20            | UNMUTATED                       |

**Supplementary Table 3:** List of the antibodies used for western blotting and flow cytometry experiments. WB: western blotting, FCM: Flow cytometry, IHC: Immunohistochemistry

| Antibody used                                                 | Catalogue Number | Company                  | Application  |
|---------------------------------------------------------------|------------------|--------------------------|--------------|
| Recombinant Anti-SCF antibody [EP665Y]                        | ab52603          | Abcam                    | WB, FCM, IHC |
| Anti-SCF antibody                                             | ab83866          | Abcam                    | WB           |
| Human/Mouse/Rat HIF-1 alpha Antibody                          | MAB1536          | R&D Systems              | WB, FCM      |
| Rabbit polyclonal c-Kit (CD117) antibody                      | A4502            | Dako                     | IHC          |
| Recombinant Rabbit IgG, monoclonal [EPR25A] - Isotype Control | ab172730         | Abcam                    | FCM          |
| Goat anti-Mouse IgG (H+L) Secondary Antibody, FITC            | A16067           | ThermoFischer Scientific | FCM          |
| Goat Anti-Rabbit IgG H&L (Phycoerythrin) preadsorbed          | ab72465          | Abcam                    | FCM          |
| Goat Anti-Rabbit IgG H&L (HRP)                                | ab97051          | Abcam                    | WB           |
| FITC Mouse Anti-Ki-67 Set                                     | 556026           | BD                       | FCM          |
| PE-Cy™5 Mouse Anti-Human CD19, Clone HIB19                    | 555414           | BD                       | FCM          |
| Goat anti-Rabbit IgG (H+L) Secondary Antibody, FITC           | 65-6111          | ThermoFischer Scientific | FCM          |

**Supplementary Table 4:** Survival analysis for the correlation of SCF protein expression with Overall Survival (OS) and Time-To-First Treatment (TTFT) in CLL cases. SCF protein expression are SCF protein levels normalized to  $\beta$ -actin from Western Blot studies. \*\*\*p<0.001.

|      | SCF high/low CLL patients           | Number of CLL patients | Median (Months) | logrank  | Hazard ratio        | C-index |
|------|-------------------------------------|------------------------|-----------------|----------|---------------------|---------|
| OS   | SCF <sup>high</sup> patients > 1.7  | 42                     | 101             | p=0.0003 | 4.496 (1.829-11.05) | 0.676   |
|      | SCF <sup>low</sup> patients ≤ 1.7   | 26                     | 185             |          | p=0.00105           |         |
| TTFT | SCF <sup>high</sup> patients > 0.93 | 34                     | 35              | p=0.0008 | 3.24 (1.66-6.31)    | 0.647   |
|      | SCF <sup>low</sup> patients ≤ 0.93  | 34                     | 113             |          | p= 0.00055          |         |

## REFERENCES

1. Arvaniti E, Ntoufa S, Papakonstantinou N, et al. Toll-like receptor signaling pathway in chronic lymphocytic leukemia: Distinct gene expression profiles of potential pathogenic significance in specific subsets of patients. *Haematologica* 2011;96(11):1644–1652.
2. Valceckiene V, Kontenyte R, Jakubauskas A, Griskevicius L. Selection of reference genes for quantitative polymerase chain reaction studies in purified B cells from B cell chronic lymphocytic leukaemia patients. *Br J Haematol* 2010;151(3):232–238.
3. Livak KJ, Schmittgen TD. Analysis of Relative Gene Expression Data Using Real-Time Quantitative PCR and the 2- $\Delta\Delta$ CT Method. *Methods* 2001;25(4):402–408.
4. Heagerty PJ, Lumley T, Pepe MS. Time-dependent ROC curves for censored survival data and a diagnostic marker. *Biometrics* 2000;56(2):337–344.
5. Li L, Greene T, Hu B. A simple method to estimate the time-dependent receiver operating characteristic curve and the area under the curve with right censored data. *Stat Methods Med Res* 2018;27(8):2264–2278.
6. Harrell FE, Califf RM, Pryor DB, Lee KL, Rosati RA. Evaluating the Yield of Medical Tests. *JAMA J Am Med Assoc* 1982;247(18):2543–2546.
